# Supplementary material for: An experimental characterization of human falling down
Source: Copernicus journal article supplement (doi:10.5194/ms-8-79-2017), 2017-03-29
Supplement: Supplementary file 1 [file ms-8-79-2017-supplement.zip]

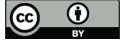

## *Supplement of*

# **An experimental characterization of human falling down**

**Libo Meng et al.**

*Correspondence to:* Xuechao Chen ([chenxuechao@bit.edu.cn](mailto:chenxuechao@bit.edu.cn))

- [ms-8-79-2017-supplement-title-page.pdf](#)
- [supplement.mp4](#)

The copyright of individual parts of the supplement might differ from the CC-BY 3.0 licence.
